# Supplementary material for: Discovery of common chemical exposures across three continents using silicone wristbands
Source: PubMed Central journal article supplement (PMC6408398; doi:10.1098/rsos.181836), 2019-02-06
Supplement: rsos181836supp1.pdf [file rsos181836supp1.pdf]

## Supplemental Material

### Discovery of common chemical exposures across three continents using silicone wristbands

Holly M. Dixon<sup>1</sup>; Georgina Armstrong<sup>2</sup>; Michael Barton<sup>1</sup>; Alan J. Bergmann<sup>1</sup>; Melissa Bondy<sup>2</sup>; Mary L. Halbleib<sup>3</sup>; Winifred Hamilton<sup>4</sup>; Erin Haynes<sup>5</sup>; Julie Herbstman<sup>6</sup>; Peter Hoffman<sup>1</sup>; Paul Jepson<sup>7</sup>; Molly L. Kile<sup>8</sup>; Laurel Kincl<sup>8</sup>; Paul J. Laurienti<sup>9</sup>; Paula North<sup>10</sup>; L. Blair Paulik<sup>1</sup>; Joe Petrosino<sup>11</sup>; Gary L. Points III<sup>1</sup>; Carolyn M. Poutasse<sup>1</sup>; Diana Rohlman<sup>8</sup>; Richard P. Scott<sup>1</sup>; Brian Smith<sup>1</sup>; Lane G. Tidwell<sup>1</sup>; Cheryl Walker<sup>12</sup>; Katrina M. Waters<sup>13</sup>; Kim A. Anderson<sup>1\*</sup>

<sup>1</sup>Food Safety and Environmental Stewardship Program, Environmental and Molecular Toxicology, Oregon State University, Corvallis, Oregon, USA

<sup>2</sup>Department of Medicine, Section of Epidemiology and Population Sciences, Baylor College of Medicine, Houston, Texas, USA

<sup>3</sup>Department of Crop and Soil Science, Oregon State University, Corvallis, Oregon, USA

<sup>4</sup>Department of Medicine, Environmental Health Section, Baylor College of Medicine, Houston, Texas, USA

<sup>5</sup>College of Medicine, Department of Environmental Health, University of Cincinnati, Cincinnati, Ohio, USA

<sup>6</sup>Columbia Center for Children's Environmental Health, Department of Environmental Health Sciences, Mailman School of Public Health, Columbia University, New York, New York, USA

<sup>7</sup>Integrated Plant Protection Center, Oregon State University, Corvallis, Oregon, USA

<sup>8</sup>College of Public Health and Human Sciences, Oregon State University, Corvallis, Oregon, USA

<sup>9</sup>Department of Radiology, Wake Forest School of Medicine, Winston-Salem, North Carolina, USA

<sup>10</sup>Department of Pathology, Medical College of Wisconsin, Milwaukee, Wisconsin, USA

<sup>11</sup>Department of Molecular Virology and Microbiology, Baylor College of Medicine, Houston, Texas, USA

<sup>12</sup>Department of Medicine, Center for Precision Environmental Health, Baylor College of Medicine, Houston, Texas, USA

<sup>13</sup>Biological Sciences Division, Pacific Northwest National Laboratory, Richland, Washington, USA

**Note:** See **Supplemental Material - Data** for the dataset. Chemicals detected are indicated with a 1 and chemicals not detected are indicated with a 0.

### Table of Contents

| Page   | Content                                                                                                                                                                   |
|--------|---------------------------------------------------------------------------------------------------------------------------------------------------------------------------|
| S2     | <b>Table S1.</b> GC-MS control parameters as previously reported in Bergmann et al. 2018.                                                                                 |
| S3     | <b>Table S2.</b> Venn diagram table for all detected chemicals in three unique groups of wristbands, corresponding to Figure 3A.                                          |
| S4     | <b>Table S3.</b> Venn diagram table for the 30% most commonly detected chemicals in three unique groups of wristbands, corresponding to Figure 3B.                        |
| S5     | <b>Table S4.</b> Venn diagram table for all detected chemicals in five unique groups of wristbands, corresponding to Figure 3C.                                           |
| S6     | <b>Table S5.</b> Venn diagram table for the 30% most commonly detected chemicals in five unique groups of wristbands, corresponding to Figure 3D.                         |
| S7-8   | <b>Table S6.</b> Tukey-Kramer HSD results for different regions, represented by (A) connecting letters of significance and (B) p-values.                                  |
| S9     | <b>Table S7.</b> Tukey-Kramer HSD results for rural and urban groups within different continents, represented by (A) connecting letters of significance and (B) p-values. |
| S10-11 | <b>Table S8.</b> Tukey-Kramer HSD results for different age groups, represented by (A) connecting letters of significance and (B) p-values.                               |
| S12    | <b>Table S9.</b> Tukey-Kramer HSD results for males and females within different continents, represented by (A) connecting letters of significance and (B) p-values.      |
| S13    | <b>Figure S1.</b> Chemical pairs detected together $\geq 20$ times in wristband samples.                                                                                  |
| S14    | <b>Figure S2.</b> The PCA shown in Figure 5, but the symbol color here indicates the presence (orange) and absence (pink) of bis(2-ethylhexyl) phthalate.                 |
| S15    | <b>Figure S3.</b> Number of chemical detections compared with wristband deployment time for all wristbands.                                                               |

**Table S1.** GC-MS control parameters as previously reported in Bergmann et al. 2018 [1].

| <b>GC-MS Settings</b>                       |                                        |                             |
|---------------------------------------------|----------------------------------------|-----------------------------|
| Injection volume ( $\mu\text{L}$ )          | 1                                      |                             |
| Mode                                        | Pulsed Splitless                       |                             |
| Heater ( $^{\circ}\text{C}$ )               | 265                                    |                             |
| Pressure (psi)                              | RTL*                                   |                             |
| Total flow (mL/min)                         | RTL*                                   |                             |
| Septum purge flow (mL/min)                  | 2                                      |                             |
| System Carrier Gas                          | Helium                                 |                             |
| Injection pulse pressure (psi)              | 25 until 0.5 min                       |                             |
| Purge flow to split vent (mL/min)           | 20 at 0.45 min                         |                             |
| Transfer line ( $^{\circ}\text{C}$ )        | 300                                    |                             |
| Column flow (mL/min)                        | RTL*                                   |                             |
| Average velocity (cm/s)                     | RTL*                                   |                             |
| <b>Temperature Program</b>                  |                                        |                             |
| Time (min)                                  | Ramp ( $^{\circ}\text{C}/\text{min}$ ) | Temp ( $^{\circ}\text{C}$ ) |
| 0                                           | 0                                      | 70                          |
| 2                                           | 25                                     | 150                         |
| 5.2                                         | 3                                      | 200                         |
| 21.9                                        | 8                                      | 280                         |
| 31.9                                        | 0                                      | 280                         |
| 46.9                                        | 40                                     | 310                         |
| 47.7                                        | 0                                      | 310                         |
| 50.7                                        | 20                                     | 325                         |
| 51.45                                       | 0                                      | 325                         |
| 53.37                                       | End Method                             |                             |
| <b>Mass Spec Settings</b>                   |                                        |                             |
| Source temp( $^{\circ}\text{C}$ )           | 300                                    |                             |
| Quad temp ( $^{\circ}\text{C}$ )            | 150                                    |                             |
| <b>Column Settings &amp; Specifications</b> |                                        |                             |
| Column Type                                 | Agilent DB-5MS                         |                             |
| Length (m)                                  | 30                                     |                             |
| Diameter ( $\mu\text{m}$ )                  | 250                                    |                             |
| Film thickness ( $\mu\text{m}$ )            | 0.25                                   |                             |

\*RTL: retention time lock, pressure and associated parameters are adjusted based on instrument operating conditions

**Table S2.** Venn diagram table for all detected chemicals in three unique groups of wristbands, corresponding to Figure 3A. Black dots with a blue background represent the wristband groups included for each intersection of the Venn diagram.

| Intersections | Wristband Groups |               |        | Number | Chemicals in Common<br>Names                                                                                                                                                                                                                                                                                                                                                                                                                                                                                                                                                                                                                                                                                                                                                                                                                                                                                                                                                                                                                                                                |
|---------------|------------------|---------------|--------|--------|---------------------------------------------------------------------------------------------------------------------------------------------------------------------------------------------------------------------------------------------------------------------------------------------------------------------------------------------------------------------------------------------------------------------------------------------------------------------------------------------------------------------------------------------------------------------------------------------------------------------------------------------------------------------------------------------------------------------------------------------------------------------------------------------------------------------------------------------------------------------------------------------------------------------------------------------------------------------------------------------------------------------------------------------------------------------------------------------|
|               | North America    | South America | Africa |        |                                                                                                                                                                                                                                                                                                                                                                                                                                                                                                                                                                                                                                                                                                                                                                                                                                                                                                                                                                                                                                                                                             |
| One           | •                |               |        | 68     | 1-naphthylamine, 2,3,6-trimethylphenol, 2,4-dimethylaniline, 2-chlorosyringaldehyde, 2-isopropylphenol, 2-sec-butylphenol, 4-tert-butylphenol, 9-methylanthracene, PBB 1, PBDE 51, PBDE 88, PBDE 100, PBDE 119, PBDE 47, PBDE 49, PBDE 99, PCB 102, PCB 88, PCB 93, PCB 95, PCB 98, TCEP, acenaphthene, alpha-chlordane, benzo[a]fluoren-11-one, benzo[a]fluorene, benzo[ghi]perylene, benzyl cinnamate, bifenthrin, bioallethrin S-cyclopentenyl isomer, bisphenol A, carvone, cinnamal, citral B, cyclopentadecanone, cyfluthrin I, cyfluthrin II, cyfluthrin III, cypermethrin-3, cyphenothrin trans-, d-(cis-trans)-phenothrin-I, drometrizole, ethofenprox, fipronil, desulfanyl-, fipronil-sulfone, gamma-chlordane, isobornyl thiocyanacetate, jasmolin II, kinoprene, methoprene II, methyleugenol, p-nitrotoluene, pentachloroanisole, phenoxyacetic acid, phthalimide, promecarb, pyriproxyfen quinolone, rabenzazole, terbucarb, tetrachlorvinphos, theobromine, tilt, trans-nonachlor, tri-p-tolyl phosphate, tricresylphosphate meta-, tricresylphosphate ortho-, triphenylene |
|               |                  | •             |        | 22     | 1,5-dimethylnaphthalene, 1-methylpyrene, 2,4'-DDT, 2,6-dimethoxyphenol, 2-ethylnaphthalene, 3,5-dichloroaniline, 4,4'-DDE, 4-chlorophenol, 4-methylphenol, 9-fluorenone, bendiocarb, benzo[a]pyrene, bisphenol AF, butachlor, cyclopenta[cd]pyrene, dichlorvos, diphenylamine, pirimiphos-methyl, tebuconazole, tetramethrin II, traseolide, trifloxystrobin                                                                                                                                                                                                                                                                                                                                                                                                                                                                                                                                                                                                                                                                                                                                |
|               |                  |               |        | •      | 6                                                                                                                                                                                                                                                                                                                                                                                                                                                                                                                                                                                                                                                                                                                                                                                                                                                                                                                                                                                                                                                                                           |
| Two           | •                | •             |        | 0      |                                                                                                                                                                                                                                                                                                                                                                                                                                                                                                                                                                                                                                                                                                                                                                                                                                                                                                                                                                                                                                                                                             |
|               | •                |               | •      | 5      | benzyl alcohol, celestolide, cyhalothrin (gamma), cyhalothrin I (lambda), triethyl phosphate                                                                                                                                                                                                                                                                                                                                                                                                                                                                                                                                                                                                                                                                                                                                                                                                                                                                                                                                                                                                |
| Two           | •                | •             |        | 54     | 1,2-dimethylnaphthalene, 1,6-dimethylnaphthalene, 1-methylphenanthrene, 2,3-dimethylanthracene, 2,4-di-tert-butylphenol, 2,4-dichlorophenol, 2-methoxy-4-methylphenol, 2-methylnaphthalene, 2-methylphenanthrene, 3,6-dimethylphenanthrene, 3-chloroaniline, 3-tert-butylphenol, 4,4'-DDD, 4,4'-DDT, 4-chloro-3,5-dimethylphenol, 4-isopropylphenol, TCPP, TPP, a-ionone, acenaphthylene, b-citronellol, b-ionone, benz[a]anthracene, benzo[b]fluorene, biphenyl, cashmeran, chlorpyrifos, chrysene, citral A, cypermethrin-2, cyphenothrin, cis-diamyl phthalate, dicyclohexyl phthalate, dimethyl phthalate, diuron metabolite (3,4-dichlorophenyl isocyanate), farnesol IV, fipronil, fluoranthene, geraniol, guaiacol, isoeugenol, lylal, malathion, naphthalene, nicotine, o-phenylphenol, permethrin, permethrin II, phenanthrene, piperonyl butoxide, promecarb artifact (5-isopropyl-3-methylphenol), retene, tributyl phosphate, tris(2-ethylhexyl) phosphate                                                                                                                      |
|               | •                |               | •      | 36     | 1-methylnaphthalene, 2,6-dimethylnaphthalene, 4-chlorophenyl isocyanate, amyl cinnamal, anthracene, benzophenone, benzothiazole, benzyl benzoate, benzyl salicylate, bis(2-ethylhexyl)phthalate, butyl benzyl phthalate, butylated hydroxyanisole, butylated hydroxytoluene, caffeine, coumarin, d-limonene, di-n-butyl phthalate, di-n-hexyl phthalate, di-n-nonyl phthalate, di-n-octyl phthalate, diethyl phthalate, diisobutyl phthalate, ethylene brassylate, eugenol, exaltolide (15-pentadecanolide), fluorene, galaxolide, hydroxy-citronellal, liliol, linalool, musk ketone, n,n-diethyl-m-toluamide, pyrene, thymol, tonalide, triclosan                                                                                                                                                                                                                                                                                                                                                                                                                                         |

**Table S3.** Venn diagram table for the 30% most commonly detected chemicals in three unique groups of wristbands, corresponding to Figure 3B. Black dots with a blue background represent the wristband groups included for each intersection of the Venn diagram.

| Intersections | Wristband Groups |               |        | Chemicals in Common |                                                                                                                                                                                                                                                                                                                                                                                                          |
|---------------|------------------|---------------|--------|---------------------|----------------------------------------------------------------------------------------------------------------------------------------------------------------------------------------------------------------------------------------------------------------------------------------------------------------------------------------------------------------------------------------------------------|
|               | North America    | South America | Africa | Number              | Names                                                                                                                                                                                                                                                                                                                                                                                                    |
| One           | •                |               |        | 23                  | 2,4-di-tert-butylphenol, 2-methylphenanthrene, 4-tert-butylphenol, PBDE 47, TCPP, benzothiazole, benzyl alcohol, bifenthrin, butylated hydroxyanisole, cinnamal, coumarin, di-n-hexyl phthalate, dicyclohexyl phthalate, dimethyl phthalate, ethofenprox, exaltolide (15-pentadecanolide), linalool, naphthalene, permethrin, permethrin II, tributyl phosphate, triclosan, tris(2-ethylhexyl) phosphate |
|               |                  | •             |        | 7                   | 4,4'-DDE, 4-isopropylphenol, chlorpyrifos, diuron metabolite (3,4-dichlorophenyl isocyanate), guaiacol, isoeugenol, pyrene                                                                                                                                                                                                                                                                               |
|               |                  |               | •      | 0                   |                                                                                                                                                                                                                                                                                                                                                                                                          |
| Two           | •                |               | •      | 1                   | musk ketone                                                                                                                                                                                                                                                                                                                                                                                              |
|               | •                | •             |        | 0                   |                                                                                                                                                                                                                                                                                                                                                                                                          |
|               | •                |               | •      | 12                  | 1-methylnaphthalene, 4-chlorophenyl isocyanate, TPP, anthracene, b-citronellol, b-ionone, benzyl benzoate, butyl benzyl phthalate, caffeine, d-limonene, lilial, piperonyl butoxide                                                                                                                                                                                                                      |
| Three         | •                | •             | •      | 13                  | amyl cinnamal, benzophenone, benzyl salicylate, bis(2-ethylhexyl)phthalate, butylated hydroxytoluene, di-n-butyl phthalate, di-n-nonyl phthalate, diethyl phthalate, diisobutyl phthalate, ethylene brassylate, galaxolide, n,n-diethyl-m-toluamide, tonalide                                                                                                                                            |

**Table S4.** Venn diagram table for all detected chemicals in five unique groups of wristbands, corresponding to Figure 3C. Black dots with a blue background represent the wristband groups included for each intersection of the Venn diagram.

| Intersections | Wristband Groups |          |            |            |                        | Chemicals in Common                                                                                                                                                                                                                  |                                                                                                                                                                                                                                                                                                                                                                                                                                                                                                                                                                                                                                                                                                                                                      |
|---------------|------------------|----------|------------|------------|------------------------|--------------------------------------------------------------------------------------------------------------------------------------------------------------------------------------------------------------------------------------|------------------------------------------------------------------------------------------------------------------------------------------------------------------------------------------------------------------------------------------------------------------------------------------------------------------------------------------------------------------------------------------------------------------------------------------------------------------------------------------------------------------------------------------------------------------------------------------------------------------------------------------------------------------------------------------------------------------------------------------------------|
|               | US Rural         | US Urban | Peru Rural | Peru Urban | Senegal & South Africa | Number                                                                                                                                                                                                                               | Names                                                                                                                                                                                                                                                                                                                                                                                                                                                                                                                                                                                                                                                                                                                                                |
| One           | •                |          |            |            |                        | 6                                                                                                                                                                                                                                    | 2-sec-butylphenol, 9-methylanthracene, cyclopentadecanone, cyphenothrin trans-, fipronil desulfanyl-, tetrachlorvinphos                                                                                                                                                                                                                                                                                                                                                                                                                                                                                                                                                                                                                              |
|               |                  | •        |            |            |                        | 48                                                                                                                                                                                                                                   | 1-naphthylamine, 2,3,6-trimethylphenol, 2,4-dimethylaniline, 2-chlorosyringaldehyde, 2-isopropylphenol, PBB 1, PBDE 51, PBDE 88, PBDE 100, PBDE 119, PBDE 49, PCB 102, PCB 88, PCB 93, PCB 95, PCB 98, acenaphthene, alpha-chlordane, benzo[a]fluoren-11-one, benzo[ghi]perylene, benzyl cinnamate, bioallethrin S-cyclopentenyl isomer, bisphenol A, citral B, cyfluthrin I, cyfluthrin II, cyfluthrin III, cypermethrin-3, d-(cis-trans)-phenothrin-I, gamma-chlordane, jasmolin II, kinoprene, methyleugenol, p-nitrotoluene, pentachloroanisole, phenoxyacetic acid, phthalimide, promecarb, pyriproxyfen, quinolone, rabenzazole, terbucarb, theobromine, tilt, trans-nonachlor, tri-p-tolyl phosphate, tricresylphosphate ortho-, triphenylene |
|               |                  |          | •          |            |                        | 13                                                                                                                                                                                                                                   | 1,5-dimethylnaphthalene, 1-methylpyrene, 2,4'-DDT, 2-ethylnaphthalene, 4-chlorophenol, bendiocarb, benzo[a]pyrene, butachlor, cyclopenta[cd]pyrene, dichlorvos, diphenylamine, tebuconazole, trifloxystrobin                                                                                                                                                                                                                                                                                                                                                                                                                                                                                                                                         |
|               |                  |          |            | •          |                        | 3                                                                                                                                                                                                                                    | 3,5-dichloroaniline, pirimiphos-methyl, traseolide                                                                                                                                                                                                                                                                                                                                                                                                                                                                                                                                                                                                                                                                                                   |
|               |                  |          |            |            | •                      | 6                                                                                                                                                                                                                                    | 1-hydroxynaphthalene, 2,3,5-trimethylphenol, musk xylene, profenofos metabolite (4-bromo-2-chlorophenol), propoxur, tetramethrin I                                                                                                                                                                                                                                                                                                                                                                                                                                                                                                                                                                                                                   |
| Two           |                  |          |            | •          | •                      | 0                                                                                                                                                                                                                                    |                                                                                                                                                                                                                                                                                                                                                                                                                                                                                                                                                                                                                                                                                                                                                      |
|               |                  |          |            | •          | •                      | 0                                                                                                                                                                                                                                    |                                                                                                                                                                                                                                                                                                                                                                                                                                                                                                                                                                                                                                                                                                                                                      |
|               |                  |          | •          | •          | •                      | 6                                                                                                                                                                                                                                    | 2,6-dimethoxyphenol, 4,4'-DDE, 4-methylphenol, 9-fluorenone, bisphenol AF, tetramethrin II                                                                                                                                                                                                                                                                                                                                                                                                                                                                                                                                                                                                                                                           |
|               |                  | •        | •          | •          | •                      | 2                                                                                                                                                                                                                                    | cyhalothrin (gamma), cyhalothrin I (lambda)                                                                                                                                                                                                                                                                                                                                                                                                                                                                                                                                                                                                                                                                                                          |
|               |                  | •        | •          | •          | •                      | 4                                                                                                                                                                                                                                    | 3-chloroaniline, 3-tert-butylphenol, citral A, diamyl phthalate                                                                                                                                                                                                                                                                                                                                                                                                                                                                                                                                                                                                                                                                                      |
|               |                  | •        | •          | •          | •                      | 11                                                                                                                                                                                                                                   | 1,2-dimethylnaphthalene, 1,6-dimethylnaphthalene, 4,4'-DDD, benz[a]anthracene, biphenyl, cashmeran, chrysene, farnesol IV, geraniol, phenanthrene, retene                                                                                                                                                                                                                                                                                                                                                                                                                                                                                                                                                                                            |
|               | •                |          |            | •          | •                      | 0                                                                                                                                                                                                                                    |                                                                                                                                                                                                                                                                                                                                                                                                                                                                                                                                                                                                                                                                                                                                                      |
| •             |                  |          | •          | •          | 1                      | malathion                                                                                                                                                                                                                            |                                                                                                                                                                                                                                                                                                                                                                                                                                                                                                                                                                                                                                                                                                                                                      |
| •             |                  |          | •          | •          | 2                      | 2,3-dimethylantracene, fluoranthene                                                                                                                                                                                                  |                                                                                                                                                                                                                                                                                                                                                                                                                                                                                                                                                                                                                                                                                                                                                      |
| •             | •                |          | •          | •          | 14                     | 4-tert-butylphenol, PBDE 47, PBDE 99, benzo[a]fluorene, bifenthrin, carvone, cinnamal, drometizole, ethofenprox, fipronil-sulfone, isobornyl thiocyanacetate, methoprene II, tricresylphosphate meta-, tris(2-chloroethyl) phosphate |                                                                                                                                                                                                                                                                                                                                                                                                                                                                                                                                                                                                                                                                                                                                                      |
| Three         |                  |          |            | •          | •                      | 0                                                                                                                                                                                                                                    |                                                                                                                                                                                                                                                                                                                                                                                                                                                                                                                                                                                                                                                                                                                                                      |
|               |                  |          |            | •          | •                      | 0                                                                                                                                                                                                                                    |                                                                                                                                                                                                                                                                                                                                                                                                                                                                                                                                                                                                                                                                                                                                                      |
|               |                  | •        |            | •          | •                      | 0                                                                                                                                                                                                                                    |                                                                                                                                                                                                                                                                                                                                                                                                                                                                                                                                                                                                                                                                                                                                                      |
|               |                  | •        |            | •          | •                      | 7                                                                                                                                                                                                                                    | 2,4-dichlorophenol, 2-methylnaphthalene, 4,4'-DDT, acenaphthylene, diuron metabolite (3,4-dichlorophenyl isocyanate), iso Eugenol, promecarb artifact (5-isopropyl-3-methylphenol)                                                                                                                                                                                                                                                                                                                                                                                                                                                                                                                                                                   |
|               | •                |          |            | •          | •                      | 0                                                                                                                                                                                                                                    |                                                                                                                                                                                                                                                                                                                                                                                                                                                                                                                                                                                                                                                                                                                                                      |
|               | •                |          |            | •          | •                      | 0                                                                                                                                                                                                                                    |                                                                                                                                                                                                                                                                                                                                                                                                                                                                                                                                                                                                                                                                                                                                                      |
|               | •                |          |            | •          | •                      | 3                                                                                                                                                                                                                                    | chlorpyrifos, cyphenothrin cis-, guaiacol                                                                                                                                                                                                                                                                                                                                                                                                                                                                                                                                                                                                                                                                                                            |
|               | •                | •        |            | •          | •                      | 3                                                                                                                                                                                                                                    | benzyl alcohol, celestolide, triethyl phosphate                                                                                                                                                                                                                                                                                                                                                                                                                                                                                                                                                                                                                                                                                                      |
| •             | •                |          | •          | •          | 3                      | dimethyl phthalate, lylal, o-phenylphenol                                                                                                                                                                                            |                                                                                                                                                                                                                                                                                                                                                                                                                                                                                                                                                                                                                                                                                                                                                      |
| •             | •                | •        | •          | •          | 11                     | 1-methylphenanthrene, 2-methylphenanthrene, 3,6-dimethylphenanthrene, 4-chloro-3,5-dimethylphenol, benzo[b]fluorene, fipronil, naphthalene, nicotine, permethrin, permethrin II, tributyl phosphate                                  |                                                                                                                                                                                                                                                                                                                                                                                                                                                                                                                                                                                                                                                                                                                                                      |
| Four          | •                | •        | •          | •          |                        | 12                                                                                                                                                                                                                                   | 2,4-di-tert-butylphenol, 2-methoxy-4-methylphenol, 4-isopropylphenol, a-ionone, b-citronellol, b-ionone, cypermethrin-2, dicyclohexyl phthalate, piperonyl butoxide, triphenyl phosphate, tris(1-chloro-2-propyl) phosphate, tris(2-ethylhexyl) phosphate                                                                                                                                                                                                                                                                                                                                                                                                                                                                                            |
|               | •                | •        | •          | •          | •                      | 4                                                                                                                                                                                                                                    | 2,6-dimethylnaphthalene, benzothiazole, butylated hydroxyanisole, hydroxy-citronellal                                                                                                                                                                                                                                                                                                                                                                                                                                                                                                                                                                                                                                                                |
|               | •                | •        | •          | •          | •                      | 1                                                                                                                                                                                                                                    | di-n-hexyl phthalate                                                                                                                                                                                                                                                                                                                                                                                                                                                                                                                                                                                                                                                                                                                                 |
|               | •                | •        | •          | •          | •                      | 0                                                                                                                                                                                                                                    |                                                                                                                                                                                                                                                                                                                                                                                                                                                                                                                                                                                                                                                                                                                                                      |
|               | •                | •        | •          | •          | •                      | 3                                                                                                                                                                                                                                    | eugenol, fluorene, thymol                                                                                                                                                                                                                                                                                                                                                                                                                                                                                                                                                                                                                                                                                                                            |
| Five          | •                | •        | •          | •          | •                      | 28                                                                                                                                                                                                                                   | 1-methylnaphthalene, 4-chlorophenyl isocyanate, amyl cinnamal, anthracene, benzophenone, benzyl benzoate, benzyl salicylate, bis(2-ethylhexyl)phthalate, butyl benzyl phthalate, butylated hydroxytoluene, caffeine, coumarin, d-limonene, di-n-butyl phthalate, di-n-nonyl phthalate, di-n-octyl phthalate, diethyl phthalate, diisobutyl phthalate, ethylene brassylate, exaltolide (15-pentadecanolide), galaxolide, lilyal, linalool, musk ketone, n,n-diethyl-m-toluamide, pyrene, tonalide, triclosan                                                                                                                                                                                                                                          |

**Table S5.** Venn diagram table for the 30% most commonly detected chemicals in five unique groups of wristbands, corresponding to Figure 3D. Black dots with a blue background represent the wristband groups included for each intersection of the Venn diagram.

| Intersections | Wristband Groups |          |            |            |                        | Chemicals in Common |                                                                                                                                                                                                                                                                                          |
|---------------|------------------|----------|------------|------------|------------------------|---------------------|------------------------------------------------------------------------------------------------------------------------------------------------------------------------------------------------------------------------------------------------------------------------------------------|
|               | US Rural         | US Urban | Peru Rural | Peru Urban | Senegal & South Africa | Number              | Names                                                                                                                                                                                                                                                                                    |
| One           | •                |          |            |            |                        | 2                   | di-n-hexyl phthalate, tris(2-ethylhexyl) phosphate                                                                                                                                                                                                                                       |
|               |                  | •        |            |            |                        | 17                  | 2,4-di-tert-butylphenol, 4-chlorophenyl isocyanate, 4-tert-butylphenol, PBB 1, PBDE 47, benzothiazole, benzyl alcohol, butylated hydroxyanisole, cinnamal, d-limonene, dicyclohexyl phthalate, dimethyl phthalate, ethofenprox, linalool, naphthalene, permethrin II, tributyl phosphate |
|               |                  |          | •          |            |                        | 8                   | 4,4'-DDE, 4-isopropylphenol, chlorpyrifos, exaltolide (15-pentadecanolide), guaiacol, isoeugenol, pyrene, trifloxystrobin                                                                                                                                                                |
|               |                  |          |            | •          |                        | 1                   | diuron metabolite (3,4-dichlorophenyl isocyanate)                                                                                                                                                                                                                                        |
|               |                  |          |            |            | •                      | 0                   |                                                                                                                                                                                                                                                                                          |
| Two           |                  |          |            | •          | •                      | 1                   | musk ketone                                                                                                                                                                                                                                                                              |
|               |                  |          | •          | •          | •                      | 0                   |                                                                                                                                                                                                                                                                                          |
|               |                  | •        | •          | •          | •                      | 0                   |                                                                                                                                                                                                                                                                                          |
|               |                  | •        | •          | •          | •                      | 0                   |                                                                                                                                                                                                                                                                                          |
|               |                  | •        | •          | •          | •                      | 0                   |                                                                                                                                                                                                                                                                                          |
|               | •                |          |            |            | •                      | 3                   | 1-methylnaphthalene, 2-methylphenanthrene, coumarin                                                                                                                                                                                                                                      |
|               | •                |          |            |            | •                      | 0                   |                                                                                                                                                                                                                                                                                          |
|               | •                |          |            |            | •                      | 0                   |                                                                                                                                                                                                                                                                                          |
| Three         |                  |          | •          | •          | •                      | 0                   |                                                                                                                                                                                                                                                                                          |
|               |                  | •        | •          | •          | •                      | 0                   |                                                                                                                                                                                                                                                                                          |
|               |                  | •        | •          | •          | •                      | 0                   |                                                                                                                                                                                                                                                                                          |
|               |                  | •        | •          | •          | •                      | 0                   |                                                                                                                                                                                                                                                                                          |
|               | •                |          | •          | •          | •                      | 0                   |                                                                                                                                                                                                                                                                                          |
|               | •                |          | •          | •          | •                      | 0                   |                                                                                                                                                                                                                                                                                          |
|               | •                |          | •          | •          | •                      | 0                   |                                                                                                                                                                                                                                                                                          |
|               | •                | •        | •          | •          | •                      | 0                   |                                                                                                                                                                                                                                                                                          |
|               | •                | •        | •          | •          | •                      | 0                   |                                                                                                                                                                                                                                                                                          |
|               | •                | •        | •          | •          | •                      | 1                   | b-citronellol                                                                                                                                                                                                                                                                            |
|               | •                | •        | •          | •          | •                      | 2                   | benzyl benzoate, piperonyl butoxide                                                                                                                                                                                                                                                      |
| Four          | •                | •        | •          | •          | •                      | 5                   | anthracene, butyl benzyl phthalate, caffeine, linal, triphenyl phosphate                                                                                                                                                                                                                 |
|               | •                | •        | •          | •          | •                      | 0                   |                                                                                                                                                                                                                                                                                          |
|               | •                | •        | •          | •          | •                      | 0                   |                                                                                                                                                                                                                                                                                          |
|               | •                | •        | •          | •          | •                      | 0                   |                                                                                                                                                                                                                                                                                          |
|               | •                | •        | •          | •          | •                      | 0                   |                                                                                                                                                                                                                                                                                          |
| Five          | •                | •        | •          | •          | •                      | 13                  | amyl cinnamal, benzophenone, benzyl salicylate, bis(2-ethylhexyl)phthalate, butylated hydroxytoluene, di-n-butyl phthalate, di-n-nonyl phthalate, diethyl phthalate, diisobutyl phthalate, ethylene brassylate, galaxolide, n,n-diethyl-m-toluamide, tonalide                            |

**Table S6.** Tukey-Kramer HSD results for different regions, represented by (A) connecting letters of significance and (B) p-values. For the connecting levels, levels not connected by the same letter are significantly different. Wristband groups highlighted in grey are not included because of a small sample size.

**A**

| Wristband Group                                          | Connecting Letters |   |   |   |   | Mean Chemicals Detected |
|----------------------------------------------------------|--------------------|---|---|---|---|-------------------------|
| <b>Total Chemicals Detected</b>                          |                    |   |   |   |   |                         |
| Texas                                                    | A                  |   |   |   |   | 28.2                    |
| North Carolina                                           | A                  | B |   |   |   | 24.6                    |
| Oregon                                                   |                    | B |   |   |   | 23.9                    |
| New York                                                 |                    | B | C |   |   | 21.3                    |
| South Africa                                             |                    |   |   |   |   | 19.0                    |
| Alto Mayo                                                |                    |   |   | D |   | 17.8                    |
| Washington, D.C.                                         |                    |   | C | D |   | 17.7                    |
| Ohio                                                     |                    |   | C | D |   | 17.6                    |
| Senegal                                                  |                    |   |   |   | E | 10.0                    |
| <b>Potential Endocrine Disrupting Chemicals Detected</b> |                    |   |   |   |   |                         |
| Texas                                                    | A                  |   |   |   |   | 19.0                    |
| North Carolina                                           |                    | B | C |   |   | 16.2                    |
| Oregon                                                   | A                  | B |   |   |   | 16.9                    |
| New York                                                 |                    |   | C | D |   | 14.0                    |
| South Africa                                             |                    |   |   |   |   | 12.5                    |
| Alto Mayo                                                |                    |   |   | D |   | 13.6                    |
| Washington, D.C.                                         |                    |   |   | D |   | 12.9                    |
| Ohio                                                     |                    |   |   | D |   | 13.3                    |
| Senegal                                                  |                    |   |   |   | E | 7.8                     |

**B**

| Comparing Two Wristband Groups |                  | Tukey-Kramer HSD p-value |                                                   |
|--------------------------------|------------------|--------------------------|---------------------------------------------------|
| Group 1                        | Group 2          | Total Chemicals Detected | Potential Endocrine Disrupting Chemicals Detected |
| Texas                          | Senegal          | <0.0001*                 | <0.0001*                                          |
| Texas                          | Ohio             | <0.0001*                 | <0.0001*                                          |
| Texas                          | Washington, D.C. | <0.0001*                 | <0.0001*                                          |
| Texas                          | Alto Mayo        | <0.0001*                 | <0.0001*                                          |
| Texas                          | New York         | <0.0001*                 | <0.0001*                                          |
| Texas                          | Oregon           | 0.01*                    | 0.11                                              |
| Texas                          | North Carolina   | 0.17                     | 0.0496*                                           |
| Oregon                         | Senegal          | <0.0001*                 | <0.0001*                                          |
| Oregon                         | Ohio             | <0.0001*                 | 0.0002*                                           |
| Oregon                         | Washington, D.C. | <0.0001*                 | <0.0001*                                          |
| Oregon                         | Alto Mayo        | <0.0001*                 | <0.0001*                                          |
| Oregon                         | New York         | 0.44                     | 0.007*                                            |
| Ohio                           | Senegal          | <0.0001*                 | <0.0001*                                          |
| North Carolina                 | Senegal          | <0.0001*                 | <0.0001*                                          |
| North Carolina                 | Ohio             | <0.0001*                 | 0.04*                                             |
| North Carolina                 | Washington, D.C. | <0.0001*                 | 0.01*                                             |
| North Carolina                 | Alto Mayo        | <0.0001*                 | 0.02*                                             |
| North Carolina                 | New York         | 0.32                     | 0.25                                              |

|                  |                  |                    |                    |
|------------------|------------------|--------------------|--------------------|
| North Carolina   | Oregon           | 1.00               | 0.99               |
| New York         | Senegal          | <b>&lt;0.0001*</b> | <b>&lt;0.0001*</b> |
| New York         | Ohio             | 0.14               | 0.99               |
| New York         | Washington, D.C. | 0.17               | 0.95               |
| New York         | Alto Mayo        | <b>0.047*</b>      | 1.00               |
| Washington, D.C. | Senegal          | <b>&lt;0.0001*</b> | <b>&lt;0.0001*</b> |
| Washington, D.C. | Ohio             | 1.00               | 1.00               |
| Alto Mayo        | Senegal          | <b>&lt;0.0001*</b> | <b>&lt;0.0001*</b> |
| Alto Mayo        | Ohio             | 1.00               | 1.00               |
| Alto Mayo        | Washington, D.C. | 1.00               | 0.98               |



**Table S7.** Tukey-Kramer HSD results for rural and urban groups within different continents, represented by (A) connecting letters of significance and (B) p-values. For the connecting levels, levels not connected by the same letter are significantly different. Wristband groups highlighted in grey are not included because of a small sample size.

**A**

| Wristband Group                                          | Connecting Letters |   |   |  |  | Mean Chemicals Detected |
|----------------------------------------------------------|--------------------|---|---|--|--|-------------------------|
| <b>Total Chemicals Detected</b>                          |                    |   |   |  |  |                         |
| North America Urban                                      | A                  |   |   |  |  | 23.1                    |
| North America Rural                                      |                    | B |   |  |  | 19.9                    |
| Africa Urban                                             |                    |   |   |  |  | 19.0                    |
| South America Urban                                      |                    | B |   |  |  | 19.0                    |
| South America Rural                                      |                    | B |   |  |  | 17.3                    |
| Africa Rural                                             |                    |   | C |  |  | 10.0                    |
| <b>Potential Endocrine Disrupting Chemicals Detected</b> |                    |   |   |  |  |                         |
| North America Urban                                      | A                  |   |   |  |  | 15.9                    |
| North America Rural                                      | A                  | B |   |  |  | 14.6                    |
| Africa Urban                                             |                    |   |   |  |  | 12.5                    |
| South America Urban                                      | A                  | B |   |  |  | 14.2                    |
| South America Rural                                      |                    | B |   |  |  | 13.4                    |
| Africa Rural                                             |                    |   | C |  |  | 7.8                     |

**B**

| Comparing Two Wristband Groups |                     | Tukey-Kramer HSD p-value |                                                   |
|--------------------------------|---------------------|--------------------------|---------------------------------------------------|
| Group 1                        | Group 2             | Total Chemicals Detected | Potential Endocrine Disrupting Chemicals Detected |
| North America Urban            | Africa Rural        | <0.0001*                 | <0.0001*                                          |
| North America Rural            | Africa Rural        | <0.0001*                 | <0.0001*                                          |
| South America Urban            | Africa Rural        | <0.0001*                 | <0.0001*                                          |
| South America Rural            | Africa Rural        | <0.0001*                 | <0.0001*                                          |
| North America Urban            | South America Rural | <0.0001*                 | 0.0004*                                           |
| North America Urban            | South America Urban | 0.02*                    | 0.25                                              |
| North America Rural            | South America Rural | 0.21                     | 0.59                                              |
| North America Urban            | North America Rural | 0.02*                    | 0.30                                              |
| North America Rural            | South America Urban | 0.98                     | 0.99                                              |
| South America Urban            | South America Rural | 0.77                     | 0.93                                              |

**Table S8.** Tukey-Kramer HSD results for different age groups, represented by (A) connecting letters of significance and (B) p-values. For the connecting levels, levels not connected by the same letter are significantly different. Wristband groups highlighted in grey are not included because of a small sample size.

## A

| Wristband Group                                          | Connecting Letters |   |   |   |   | Mean Chemicals Detected |
|----------------------------------------------------------|--------------------|---|---|---|---|-------------------------|
| <b>Total Chemicals Detected</b>                          |                    |   |   |   |   |                         |
| North America >60                                        | A                  |   |   |   |   | 29.1                    |
| North America <11                                        | A                  | B |   |   |   | 25.1                    |
| North America 41-60                                      | A                  | B | C |   |   | 24.2                    |
| North America 21-40                                      | A                  | B | C |   |   | 22.2                    |
| South America >60                                        |                    | B | C | D |   | 20.6                    |
| South America <11                                        | A                  | B | C | D | E | 20.0                    |
| South America 11-20                                      |                    |   | C | D | E | 17.2                    |
| South America 41-60                                      |                    |   |   | D | E | 17.0                    |
| South America 21-40                                      |                    |   |   | D | E | 17.1                    |
| Africa 11-20                                             |                    |   |   |   |   | 10.0                    |
| Africa 21-40                                             |                    |   |   |   | F | 10.0                    |
| Africa 41-60                                             |                    |   |   | E | F | 9.8                     |
| <b>Potential Endocrine Disrupting Chemicals Detected</b> |                    |   |   |   |   |                         |
| North America >60                                        | A                  |   |   |   |   | 21.4                    |
| North America <11                                        | A                  | B |   |   |   | 17.4                    |
| North America 41-60                                      | A                  | B | C |   |   | 17.2                    |
| North America 21-40                                      |                    |   | C | D |   | 14.5                    |
| South America >60                                        |                    | B | C | D |   | 15.8                    |
| South America <11                                        | A                  | B | C | D |   | 15.3                    |
| South America 11-20                                      |                    | B | C | D | E | 13.7                    |
| South America 41-60                                      |                    |   |   | D | E | 12.8                    |
| South America 21-40                                      |                    |   |   | D |   | 13.2                    |
| Africa 11-20                                             |                    |   |   |   |   | 8.0                     |
| Africa 21-40                                             |                    |   |   |   | F | 7.6                     |
| Africa 41-60                                             |                    |   |   | E | F | 7.5                     |

## B

| Comparing Two Wristband Groups |                     | Tukey-Kramer HSD p-value |                                                   |
|--------------------------------|---------------------|--------------------------|---------------------------------------------------|
| Group 1                        | Group 2             | Total Chemicals Detected | Potential Endocrine Disrupting Chemicals Detected |
| North America >60              | Africa 41-60        | <0.0001*                 | <0.0001*                                          |
| North America >60              | Africa 21-40        | <0.0001*                 | <0.0001*                                          |
| North America <11              | Africa 41-60        | <0.0001*                 | <0.0001*                                          |
| North America <11              | Africa 21-40        | <0.0001*                 | <0.0001*                                          |
| North America 41-60            | Africa 41-60        | <0.0001*                 | <0.0001*                                          |
| North America 41-60            | Africa 21-40        | <0.0001*                 | <0.0001*                                          |
| North America 21-40            | Africa 41-60        | 0.0006*                  | 0.003*                                            |
| North America 21-40            | Africa 21-40        | <0.0001*                 | <0.0001*                                          |
| North America >60              | South America 41-60 | <0.0001*                 | <0.0001*                                          |
| North America >60              | South America 21-40 | <0.0001*                 | <0.0001*                                          |
| North America >60              | South America 11-20 | 0.0005*                  | 0.0002*                                           |
| South America >60              | Africa 41-60        | 0.03*                    | 0.001*                                            |

|                     |                     |                    |                    |
|---------------------|---------------------|--------------------|--------------------|
| South America >60   | Africa 21-40        | <b>0.0001*</b>     | <b>&lt;0.0001*</b> |
| South America <11   | Africa 41-60        | 0.17               | <b>0.03*</b>       |
| South America <11   | Africa 21-40        | <b>0.03*</b>       | <b>0.002*</b>      |
| North America >60   | South America <11   | 0.16               | 0.08               |
| North America >60   | South America >60   | <b>0.047*</b>      | <b>0.02*</b>       |
| North America <11   | South America 41-60 | <b>&lt;0.0001*</b> | <b>&lt;0.0001*</b> |
| North America <11   | South America 21-40 | <b>&lt;0.0001*</b> | <b>0.0001*</b>     |
| North America <11   | South America 11-20 | <b>0.003*</b>      | 0.07               |
| South America 11-20 | Africa 41-60        | 0.37               | 0.06               |
| South America 21-40 | Africa 41-60        | 0.26               | <b>0.047*</b>      |
| South America 41-60 | Africa 41-60        | 0.26               | 0.08               |
| South America 11-20 | Africa 21-40        | <b>0.04*</b>       | <b>0.0005*</b>     |
| North America 41-60 | South America 41-60 | <b>0.002*</b>      | <b>0.003*</b>      |
| North America 41-60 | South America 21-40 | <b>0.003*</b>      | <b>0.01*</b>       |
| South America 21-40 | Africa 21-40        | <b>0.002*</b>      | <b>&lt;0.0001*</b> |
| South America 41-60 | Africa 21-40        | <b>0.002*</b>      | <b>&lt;0.0001*</b> |
| North America >60   | North America 21-40 | 0.053              | <b>&lt;0.0001*</b> |
| North America 41-60 | South America 11-20 | 0.06               | 0.25               |
| North America 21-40 | South America 41-60 | <b>0.01*</b>       | 0.73               |
| North America <11   | South America <11   | 0.74               | 0.97               |
| North America 21-40 | South America 21-40 | <b>0.02*</b>       | 0.95               |
| North America >60   | North America 41-60 | 0.59               | 0.14               |
| North America 21-40 | South America 11-20 | 0.30               | 1.00               |
| North America <11   | South America >60   | 0.39               | 0.95               |
| North America 41-60 | South America <11   | 0.94               | 0.99               |
| North America >60   | North America <11   | 0.70               | 0.08               |
| North America 41-60 | South America >60   | 0.85               | 0.99               |
| South America >60   | South America 41-60 | 0.82               | 0.41               |
| South America >60   | South America 21-40 | 0.84               | 0.64               |
| South America >60   | South America 11-20 | 0.96               | 0.95               |
| South America <11   | South America 41-60 | 0.99               | 0.95               |
| North America <11   | North America 21-40 | 0.37               | 0.99               |
| South America <11   | South America 21-40 | 0.99               | <b>0.006*</b>      |
| South America <11   | South America 11-20 | 1.00               | 1.00               |
| North America 21-40 | South America <11   | 1.00               | 1.00               |
| North America 41-60 | North America 21-40 | 0.97               | 0.19               |
| North America 21-40 | South America >60   | 1.00               | 1.00               |
| North America <11   | North America 41-60 | 1.00               | 1.00               |
| South America >60   | South America <11   | 1.00               | 1.00               |
| Africa 21-40        | Africa 41-60        | 1.00               | 1.00               |
| South America 11-20 | South America 41-60 | 1.00               | 1.00               |
| South America 11-20 | South America 21-40 | 1.00               | 1.00               |
| South America 21-40 | South America 41-60 | 1.00               | 1.00               |

**Table S9.** Tukey-Kramer HSD results for males and females within different continents, represented by (A) connecting letters of significance and (B) p-values. For the connecting levels, levels not connected by the same letter are significantly different.

A

| Wristband Group                                          | Connecting Letters |   |   |   |   | Mean Chemicals Detected |
|----------------------------------------------------------|--------------------|---|---|---|---|-------------------------|
| <b>Total Chemicals Detected</b>                          |                    |   |   |   |   |                         |
| North America Male                                       | A                  |   |   |   |   | 24.5                    |
| North America Female                                     | A                  | B |   |   |   | 21.7                    |
| South America Female                                     |                    | B | C |   |   | 18.6                    |
| South America Male                                       |                    |   | C |   |   | 16.8                    |
| Africa Female                                            |                    |   | C | D |   | 12.3                    |
| Africa Male                                              |                    |   |   | D |   | 10.0                    |
| <b>Potential Endocrine Disrupting Chemicals Detected</b> |                    |   |   |   |   |                         |
| North America Male                                       | A                  |   |   |   |   | 16.7                    |
| North America Female                                     |                    | B |   |   |   | 14.8                    |
| South America Female                                     | A                  | B | C |   |   | 14.7                    |
| South America Male                                       |                    |   | C | D |   | 12.5                    |
| Africa Female                                            |                    |   |   | D | E | 9.5                     |
| Africa Male                                              |                    |   |   | E |   | 7.6                     |

B

| Comparing Two Wristband Groups |                      | Tukey-Kramer HSD p-value |                                                   |
|--------------------------------|----------------------|--------------------------|---------------------------------------------------|
| Group 1                        | Group 2              | Total Chemicals Detected | Potential Endocrine Disrupting Chemicals Detected |
| South America Male             | Africa Male          | <b>0.0001*</b>           | <b>&lt;0.0001*</b>                                |
| South America Male             | Africa Female        | 0.61                     | 0.51                                              |
| South America Female           | South America Male   | 0.74                     | 0.07                                              |
| South America Female           | Africa Male          | <b>&lt;0.0001*</b>       | <b>&lt;0.0001*</b>                                |
| South America Female           | Africa Female        | 0.23                     | <b>0.04*</b>                                      |
| North America Male             | South America Male   | <b>&lt;0.0001*</b>       | <b>&lt;0.0001*</b>                                |
| North America Male             | South America Female | <b>&lt;0.0001*</b>       | 0.07                                              |
| North America Male             | North America Female | 0.07                     | <b>0.04*</b>                                      |
| North America Male             | Africa Male          | <b>&lt;0.0001*</b>       | <b>&lt;0.0001*</b>                                |
| North America Male             | Africa Female        | <b>0.0003*</b>           | <b>0.0005*</b>                                    |
| North America Female           | South America Male   | <b>0.0004*</b>           | <b>0.01*</b>                                      |
| North America Female           | South America Female | 0.07                     | 1.00                                              |
| North America Female           | Africa Male          | <b>&lt;0.0001*</b>       | <b>&lt;0.0001*</b>                                |
| North America Female           | Africa Female        | <b>0.01*</b>             | <b>0.02*</b>                                      |
| Africa Female                  | Africa Male          | 0.97                     | 0.90                                              |



**Figure S2.** The PCA shown in Figure 5, but the symbol color here indicates the presence (orange) and absence (pink) of bis(2-ethylhexyl)phthalate. The black arrow indicates the direction of increasing density of presence for bis(2-ethylhexyl)phthalate.

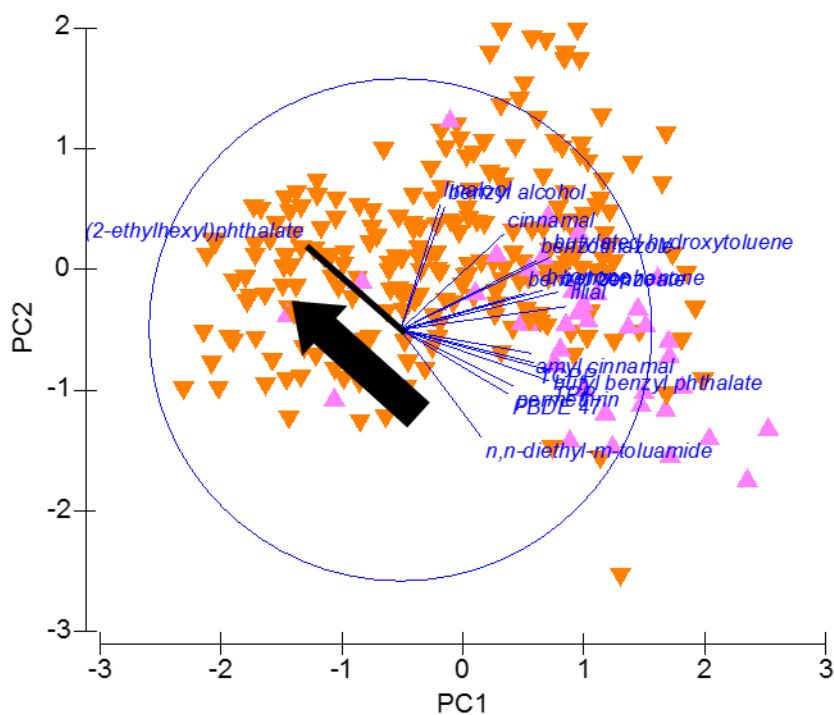

**Figure S3.** Number of chemical detections compared with wristband deployment time for all wristbands.

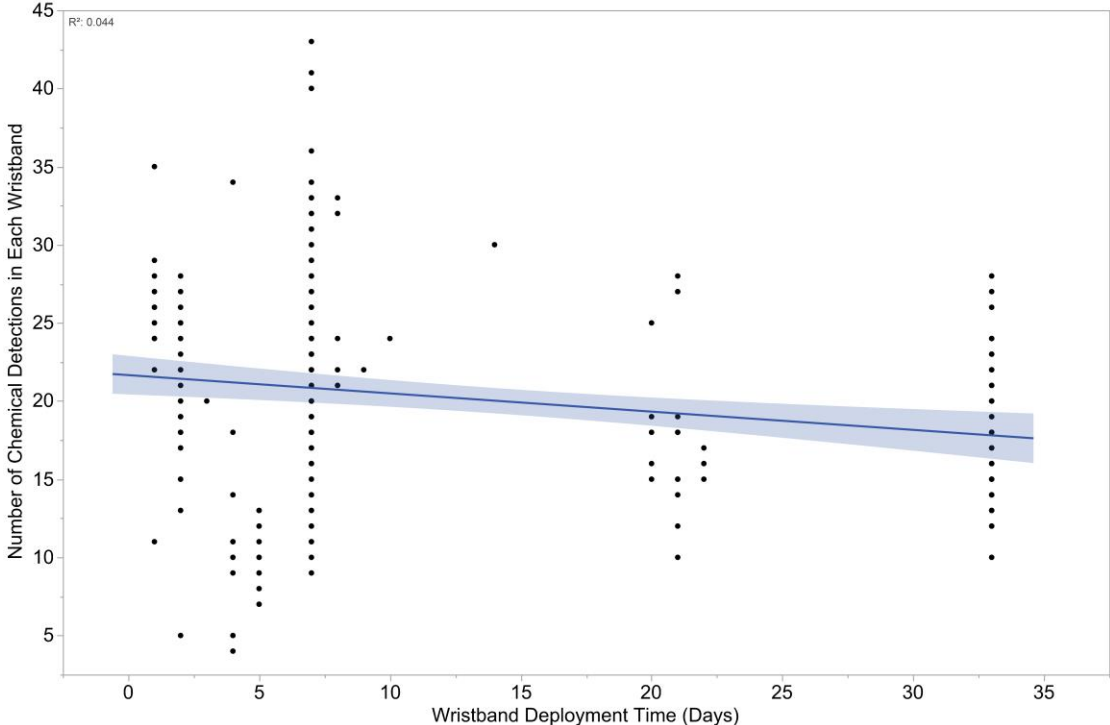

## References

1 Bergmann, A. J., Points, G. L., Scott, R. P., Wilson, G., Anderson, K. A. 2018 Development of quantitative screen for 1550 chemicals with GC-MS. *Anal. Bioanal. Chem.* **410**, 3101-3110. (10.1007/s00216-018-0997-7)
